# Supplementary material for: Improvement in the efficiency of an OrganoMetallic Fuel Cell by tuning the molecular architecture of the anode electrocatalyst and the nature of the carbon support
Source: Royal Society of Chemistry journal article supplement (doi:10.1039/c2ee22055e), 2012-01-01
Supplement: c2ee22055e.pdf [file c2ee22055e.pdf]

## Supplementary Information

### Improvement in the efficiency of an Organometallic Fuel Cell by tuning the molecular architecture of the anode electrocatalyst and the nature of the carbon support

M. Bevilacqua <sup>a</sup>, C. Bianchini <sup>a</sup>, A. Marchionni <sup>a</sup>, J. Filippi <sup>a</sup>, A. Lavacchi <sup>a</sup>, H. Miller <sup>a</sup>, W. Oberhauser <sup>a</sup>, F. Vizza <sup>a</sup>, G. Granozzi <sup>b</sup>, L. Artiglia <sup>b</sup>, S. P. Annen <sup>c</sup>, F. Krumeich <sup>c</sup>, H. Grützmacher <sup>c</sup>

- 1) Morphological properties: Vulcan XC72 vs. Ketjenblack ED 600
- 2) XRPD: 2(OAc)@Ck vs 2(OAc)@Cv
- 3) XPS: C 1s scans before and after the galvanostatic cycle of 1(OTf)@Ck
- 4) References

#### 1) Morphological properties: Vulcan XC72 vs Ketjenblack ED 600

| Carbon black Type    | Surface area (m <sup>2</sup> /g) | Pore Volume (mL/100g) | Apparent Bulk density (kg/m <sup>3</sup> ) | XPS Oxygen/Carbon atomic ratio |
|----------------------|----------------------------------|-----------------------|--------------------------------------------|--------------------------------|
| Vulcan XC72          | 254                              | 174                   | 256                                        | 0.057                          |
| Ketjenblack EC 600JD | 1400                             | 480-510               | 100-120                                    | 0.066                          |

Table S1. Summary of the main properties of Vulcan XC72 and Ketjenblack ED 600.

#### 2) XRPD

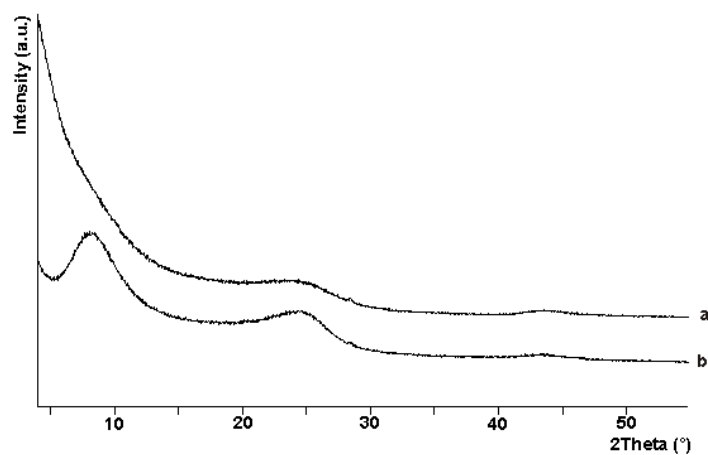

**Fig. S1.** XRPD spectra of 2(OAc)@Ck (a) and of 2(OAc)@Cv (b).

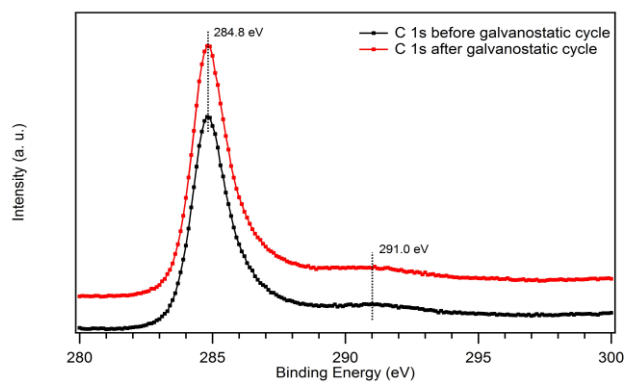

**Fig. S2.** C 1s scans (XPS), before and after the galvanostatic cycle of 1(OTf)@Ck, show two components, at 284.8 (Ck support) and 291.0 eV (C atoms bond to Rh, in an electron poor environment).

### 3) References

References concerning different carbon black properties: a) G. Wang, G. Sun, Q. Wang, S. Wang, J. Guo, Y. Gao, Q. Xin, *J. Power Sources* 2008, **180**, 176-180; b) T. Denaro, V. Baglio, M., Girolamo, V. Antonucci, A. S. Aricò, F. Matteucci, R. Ornelas, *J. Appl. Electrochem.*, 2009, **39**, 2173 – 2179.
